# Supplementary material for: Artificial intelligence-based PET denoising could allow a two-fold reduction in [18F]FDG PET acquisition time in digital PET/CT
Source: PubMed Central journal article supplement (PMC9399218; doi:10.1007/s00259-022-05800-1), 2022-05-20

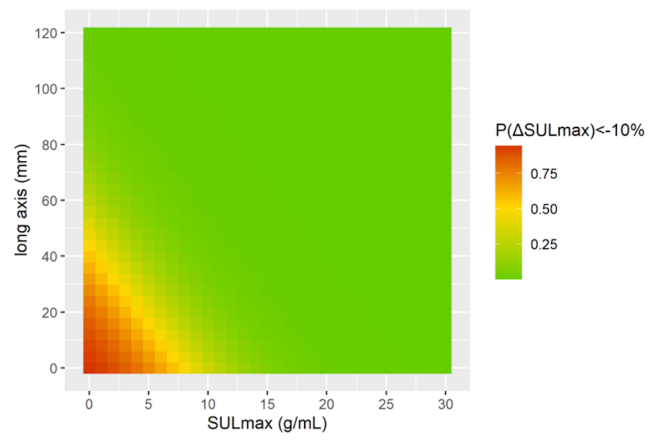

Supplement: 259_2022_5800_MOESM1_ESM.pdf [file 259_2022_5800_MOESM1_ESM.pdf]
